# Supplementary material
Source: publisher site journal article supplement (https://www.dovepress.com/article/supplementary_file/616585/616585%20Supplemental.docx)

**Supplemental Material 1 – Search strategy**

**Pubmed**

("Lidocaine"[Mesh] OR lidocaine[Title/Abstract])

AND

("Thoracic Surgery, Video-Assisted"[Mesh] OR (("video-assisted thoracic surgery" OR "video-assisted thoracoscopic surgery" OR VATS)[Title/Abstract]))

**Web of Science**

TS=("lidocaine")

AND

TS=("video-assisted thoracic surgery" OR "video-assisted thoracoscopic surgery" OR "VATS")

**Embase**

(lidocaine: ab,ti)

AND

(video assisted thoracoscopic surgery/ OR ('video assisted thoracic surgery' OR 'video-assisted thoracoscopic surgery' OR vats): ab,ti)

**Cochrane**

(MeSH descriptor: [Lidocaine] explode all trees OR lidocaine:ti,ab)

AND

(MeSH descriptor: [Thoracic Surgery, Video-Assisted] explode all trees OR ("video assisted thoracic surgery" OR "video assisted thoracoscopic surgery" OR VATS):ti,ab)

**CNKI**

SU=('Lidocaine')

AND

SU=('video-assisted thoracic surgery' OR 'thoracoscopic surgery' OR 'VATS')

**WANFANG**

Subject:("Lidocaine")

AND

Subject:("video-assisted thoracic surgery" OR "thoracoscopic surgery" OR "VATS")

**SinoMed**

"Lidocaine"[Common Fields] OR "Lidocaine"[Subject Headings]

AND

"video-assisted thoracic surgery"[Common Fields] OR "Thoracic Surgery, Video-Assisted"[Subject Headings]

**Supplemental Table 1. Leave-one-out sensitivity analysis of primary outcomes in included studies.**

| **Study** | **Intravenous lidocaine**  **No. of patients** | **Placebo**  **No. of patients** | **Random effects,**  **MD (95% CI)** | ***I2* (%)** | **P-value** |
| --- | --- | --- | --- | --- | --- |
| **Pain scores (at rest) at 6-8 h** | | | | | |
| Omitting Cui, 201124 | 270 | 261 | -0.63 (-1.26, 0.00) | 96.2% | 0.05 |
| Omitting Wang, 201526 | 260 | 251 | -0.76 (-1.41, -0.11) | 96.3% | 0.02 |
| Omitting Yao, 202130 | 249 | 240 | -0.78 (-1.42, -0.14) | 96.1% | 0.02 |
| Omitting Zheng, 202131 | 262 | 256 | -0.51 (-1.08, 0.06) | 95.6% | 0.08 |
| Omitting Xie, 202334 | 255 | 246 | -0.48 (-1.01, 0.06) | 88.4% | 0.08 |
| Omitting Ren, 202537 | 245 | 238 | -0.79 (-1.42, -0.16) | 96.0% | 0.01 |
| Omitting Zhu, 202538 | 244 | 237 | -0.63 (-1.29, 0.04) | 95.9% | 0.06 |
| Omitting Zhang, 202536 | 245 | 238 | -0.78 (-1.42, -0.13) | 96.3% | 0.02 |
| **Pain scores (at rest) at 24 h** | | | | | |
| Omitting Cui, 201124 | 325 | 314 | -0.48 (-0.87, -0.10) | 89.1% | 0.01 |
| Omitting Wang, 201526 | 315 | 304 | -0.54 (-0.95, -0.13) | 89.2% | 0.01 |
| Omitting Yao, 202130 | 304 | 293 | -0.55 (-0.96, -0.15) | 87.0% | <0.01 |
| Omitting Hou, 202128 | 315 | 304 | -0.51 (-0.92, -0.10) | 89.1% | 0.01 |
| Omitting Zheng, 202131 | 317 | 309 | -0.42 (-0.80, -0.05) | 87.8% | 0.03 |
| Omitting Fan, 202232 | 300 | 289 | -0.27 (-0.49, -0.05) | 56.3% | 0.02 |
| Omitting Ren, 202333 | 312 | 301 | -0.44 (-0.82, -0.06) | 88.5% | 0.02 |
| Omitting Hojski,202435 | 317 | 310 | -0.54 (-0.93, -0.15) | 89.2% | 0.01 |
| Omitting Ren, 202537 | 300 | 291 | -0.55 (-0.95, -0.15) | 89.2% | 0.01 |
| Omitting Zhang, 202536 | 300 | 291 | -0.56 (-0.96, -0.17) | 88.9% | 0.01 |
| **Pain scores (at rest) at 48 h** | | | | | |
| Omitting Cui, 201124 | 325 | 314 | -0.31 (-0.53, -0.09) | 64.9% | 0.01 |
| Omitting Wang, 201526 | 315 | 304 | -0.36 (-0.63, -0.09) | 66.7% | 0.01 |
| Omitting Hou, 202128 | 315 | 304 | -0.38 (-0.59, -0.17) | 60.7% | <0.01 |
| Omitting Yao, 202130 | 304 | 293 | -0.38 (-0.65, -0.10) | 65.3% | 0.01 |
| Omitting Zheng, 202131 | 317 | 309 | -0.21 (-0.28, -0.14) | 16.3% | < 0.01 |
| Omitting Fan, 202232 | 300 | 289 | -0.34 (-0.60, -0.08) | 66.1% | 0.01 |
| Omitting Ren, 202333 | 312 | 301 | -0.31 (-0.54, -0.09) | 65.1% | 0.01 |
| Omitting Hojski, 202435 | 317 | 310 | -0.37 (-0.61, -0.13) | 66.1% | <0.01 |
| Omitting Ren, 202537 | 300 | 291 | -0.37 (-0.64, -0.10) | 67.2% | 0.01 |
| Omitting Zhang, 202536 | 300 | 291 | -0.36 (-0.63, -0.09) | 66.9% | 0.01 |
| **Pain scores (during activity) at 6-8 h** | | | | | |
| Omitting Cui, 201023 | 255 | 245 | -0.77 (-1.40, -0.14) | 96.7% | 0.02 |
| Omitting Cui, 201124 | 255 | 245 | -0.73 (-1.31, -0.14) | 96.6% | 0.01 |
| Omitting Wang, 201526 | 245 | 235 | -0.41 (-0.72, -0.09) | 60.5% | 0.01 |
| Omitting Yao, 202130 | 234 | 224 | -0.93 (-1.54, -0.32) | 94.8% | <0.01 |
| Omitting Hojski, 202435 | 247 | 241 | -0.83 (-1.46, -0.20) | 96.7% | 0.01 |
| Omitting Ren, 202537 | 230 | 222 | -0.89 (-1.53, -0.26) | 96.7% | 0.01 |
| Omitting Zhu, 202538 | 229 | 221 | -0.79 (-1.44, -0.15) | 96.6% | 0.02 |
| Omitting Zhang, 202536 | 230 | 222 | -0.92 (-1.54, -0.31) | 96.6% | <0.01 |
| **Pain scores (during activity) at 24 h** | | | | | |
| Omitting Cui, 201124 | 222 | 218 | -0.76 (-1.24, -0.28) | 93.1% | <0.01 |
| Omitting Wang, 201526 | 212 | 208 | -0.69 (-1.19, -0.20) | 75.6% | 0.01 |
| Omitting Yao, 202130 | 201 | 197 | -0.92 (-1.40, -0.43) | 85.3% | <0.01 |
| Omitting Ren, 202333 | 209 | 205 | -0.62 (-1.00, -0.24) | 91.9% | <0.01 |
| Omitting Hojski, 202435 | 214 | 210 | -0.79 (-1.31, -0.26) | 93.1% | <0.01 |
| Omitting Ren, 202537 | 197 | 195 | -0.88 (-1.42, -0.35) | 93.2% | <0.01 |
| Omitting Zhang, 202536 | 197 | 195 | -0.88 (-1.42, -0.34) | 93.2% | <0.01 |
| **Pain scores (during activity) at 48 h** | | | | | |
| Omitting Cui, 201124 | 222 | 218 | -0.29 (-0.50, -0.09) | 62.5% | 0.01 |
| Omitting Wang, 201526 | 212 | 208 | -0.41 (-0.68, -0.15) | 69.0% | <0.01 |
| Omitting Yao, 202130 | 201 | 197 | -0.42 (-0.67, -0.17) | 41.6% | <0.01 |
| Omitting Ren, 202333 | 209 | 205 | -0.33 (-0.56, -0.11) | 68.6% | <0.01 |
| Omitting Hojski, 202435 | 214 | 210 | -0.29 (-0.49, -0.08) | 60.5% | 0.01 |
| Omitting Ren, 202537 | 197 | 195 | -0.35 (-0.63, -0.07) | 64.1% | 0.01 |
| Omitting Zhang, 202536 | 197 | 195 | -0.30 (-0.54, -0.06) | 54.1% | 0.02 |

**Supplemental Table 2. GRADE evidence of primary outcomes and clinically important secondary outcomes in included studies.**

**
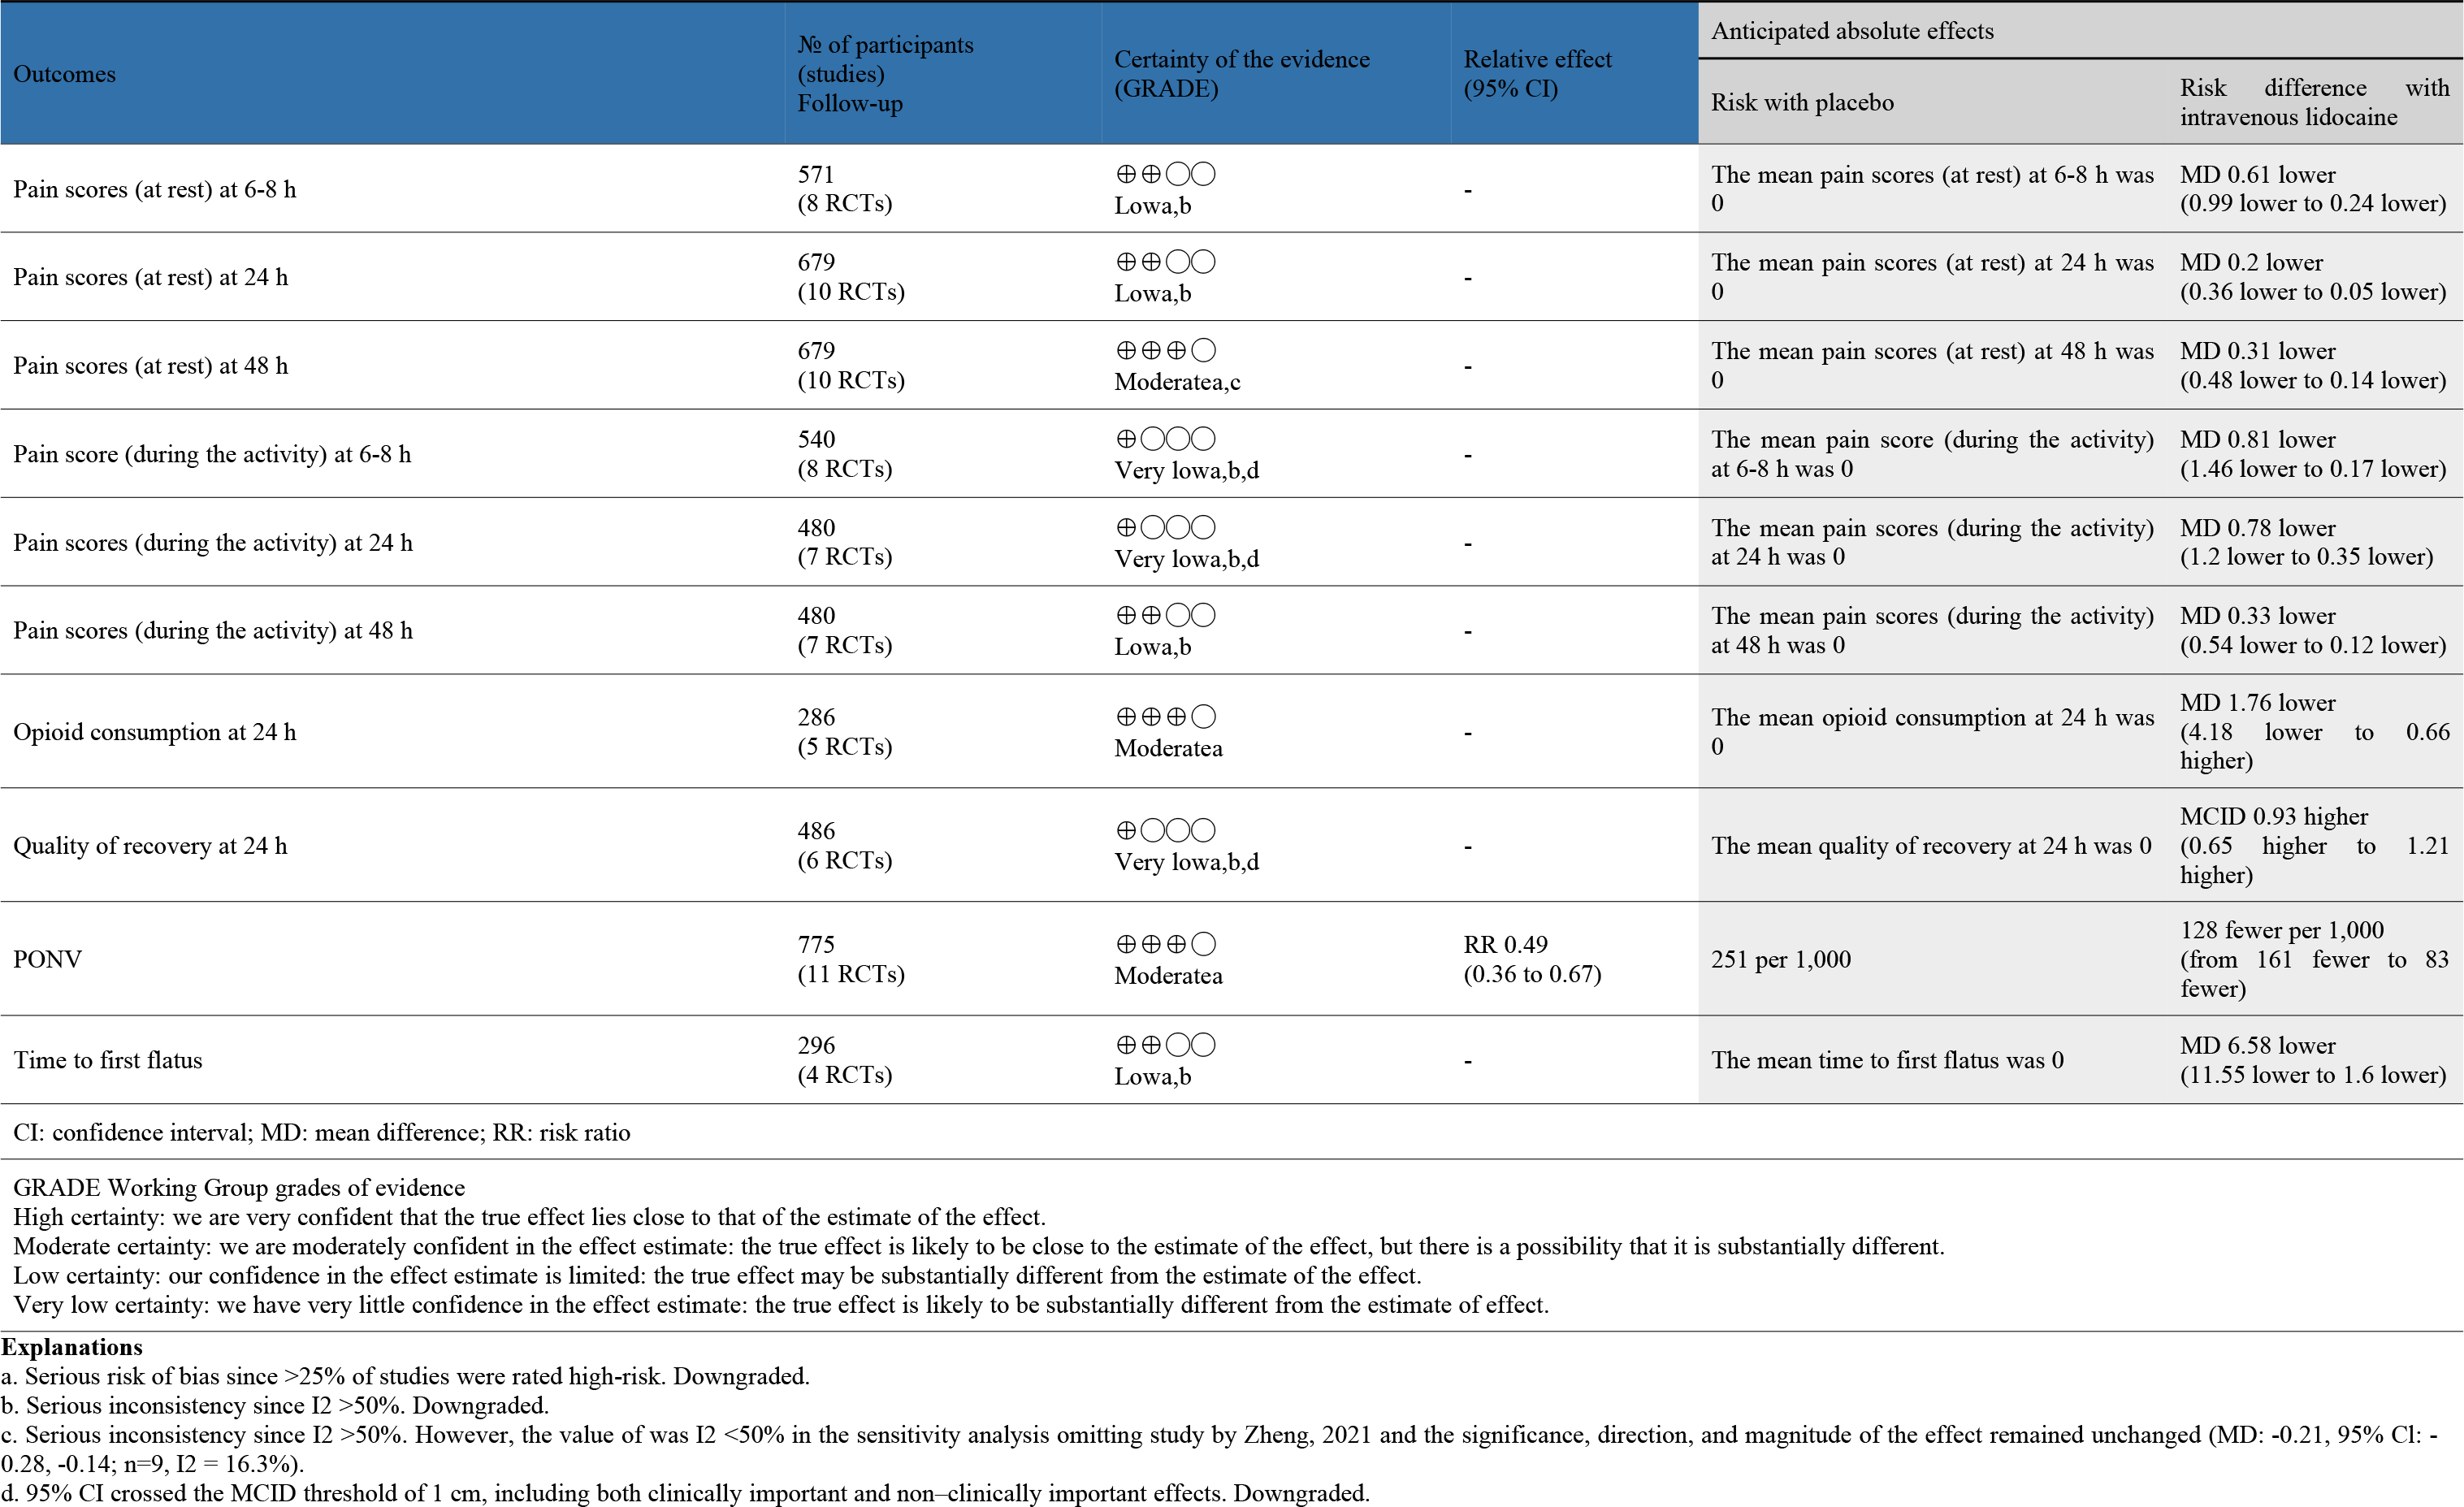
**

**Supplemental Figure 1. The risk of bias of the included studies.**

**(A) Risk of bias graph: review authors’ judgements for included studies.**

**
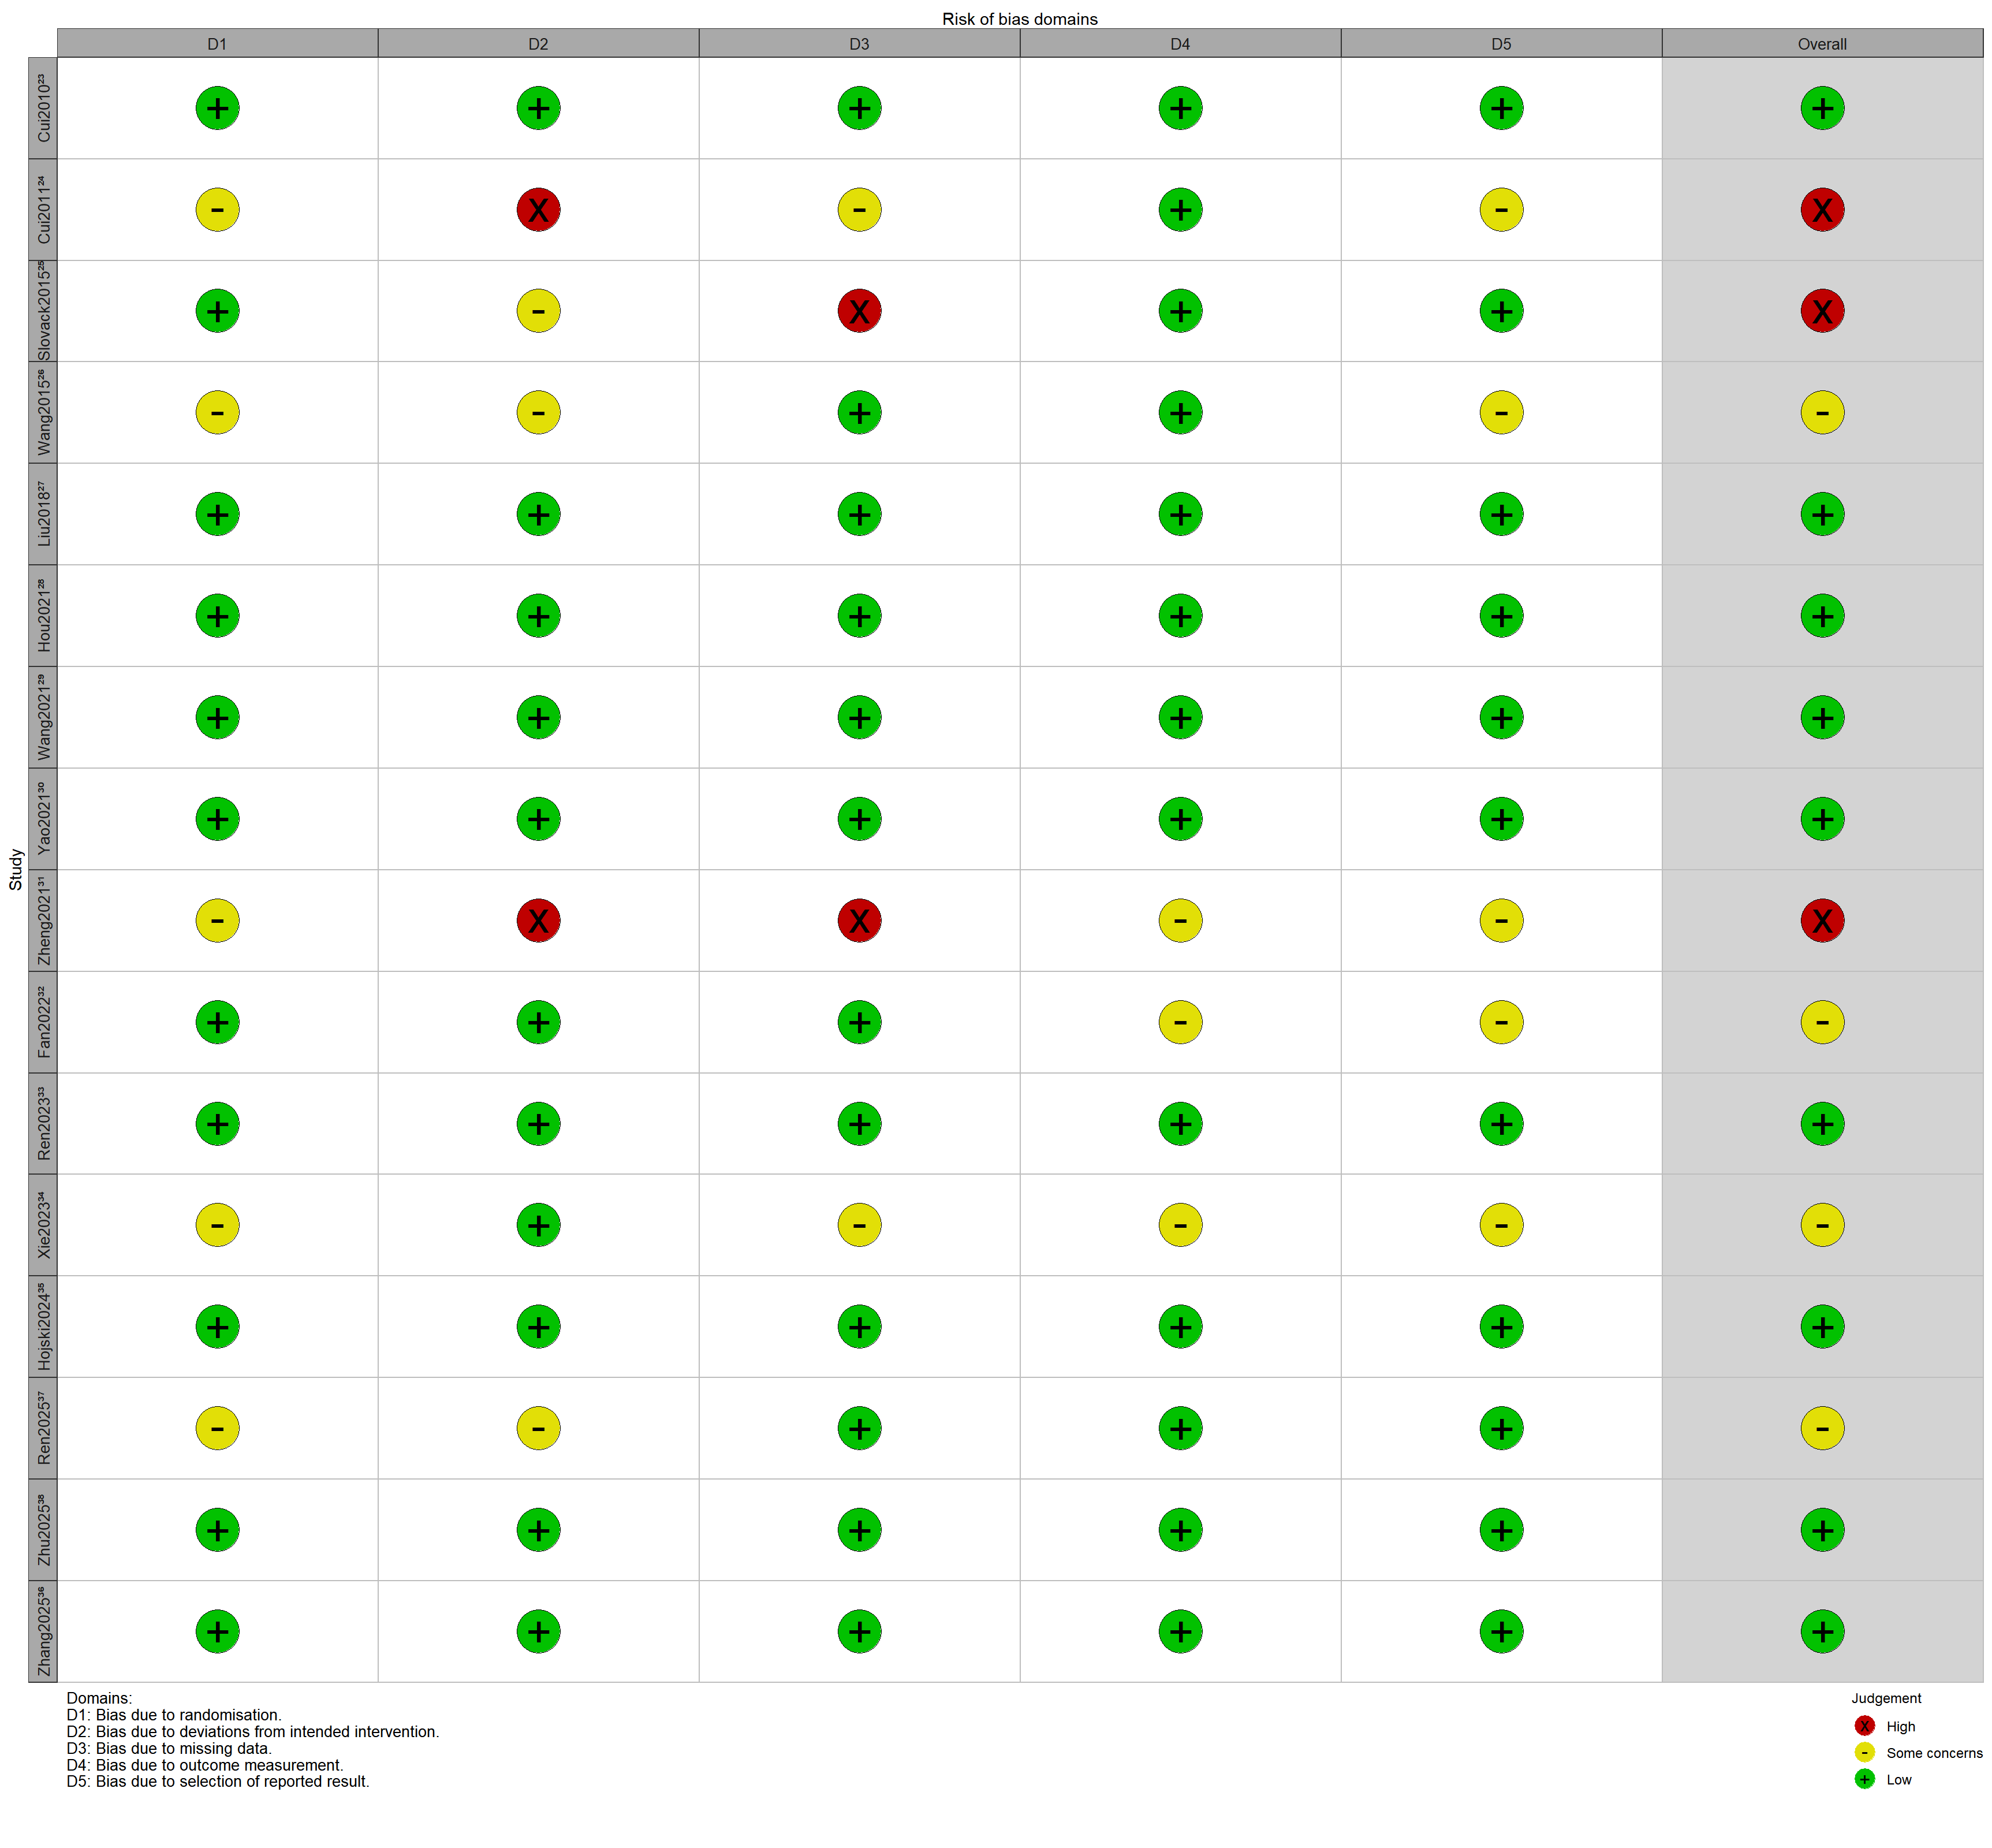
**

**(B) Risk of bias summary: review authors’ judgements presented as percentage across included studies.**


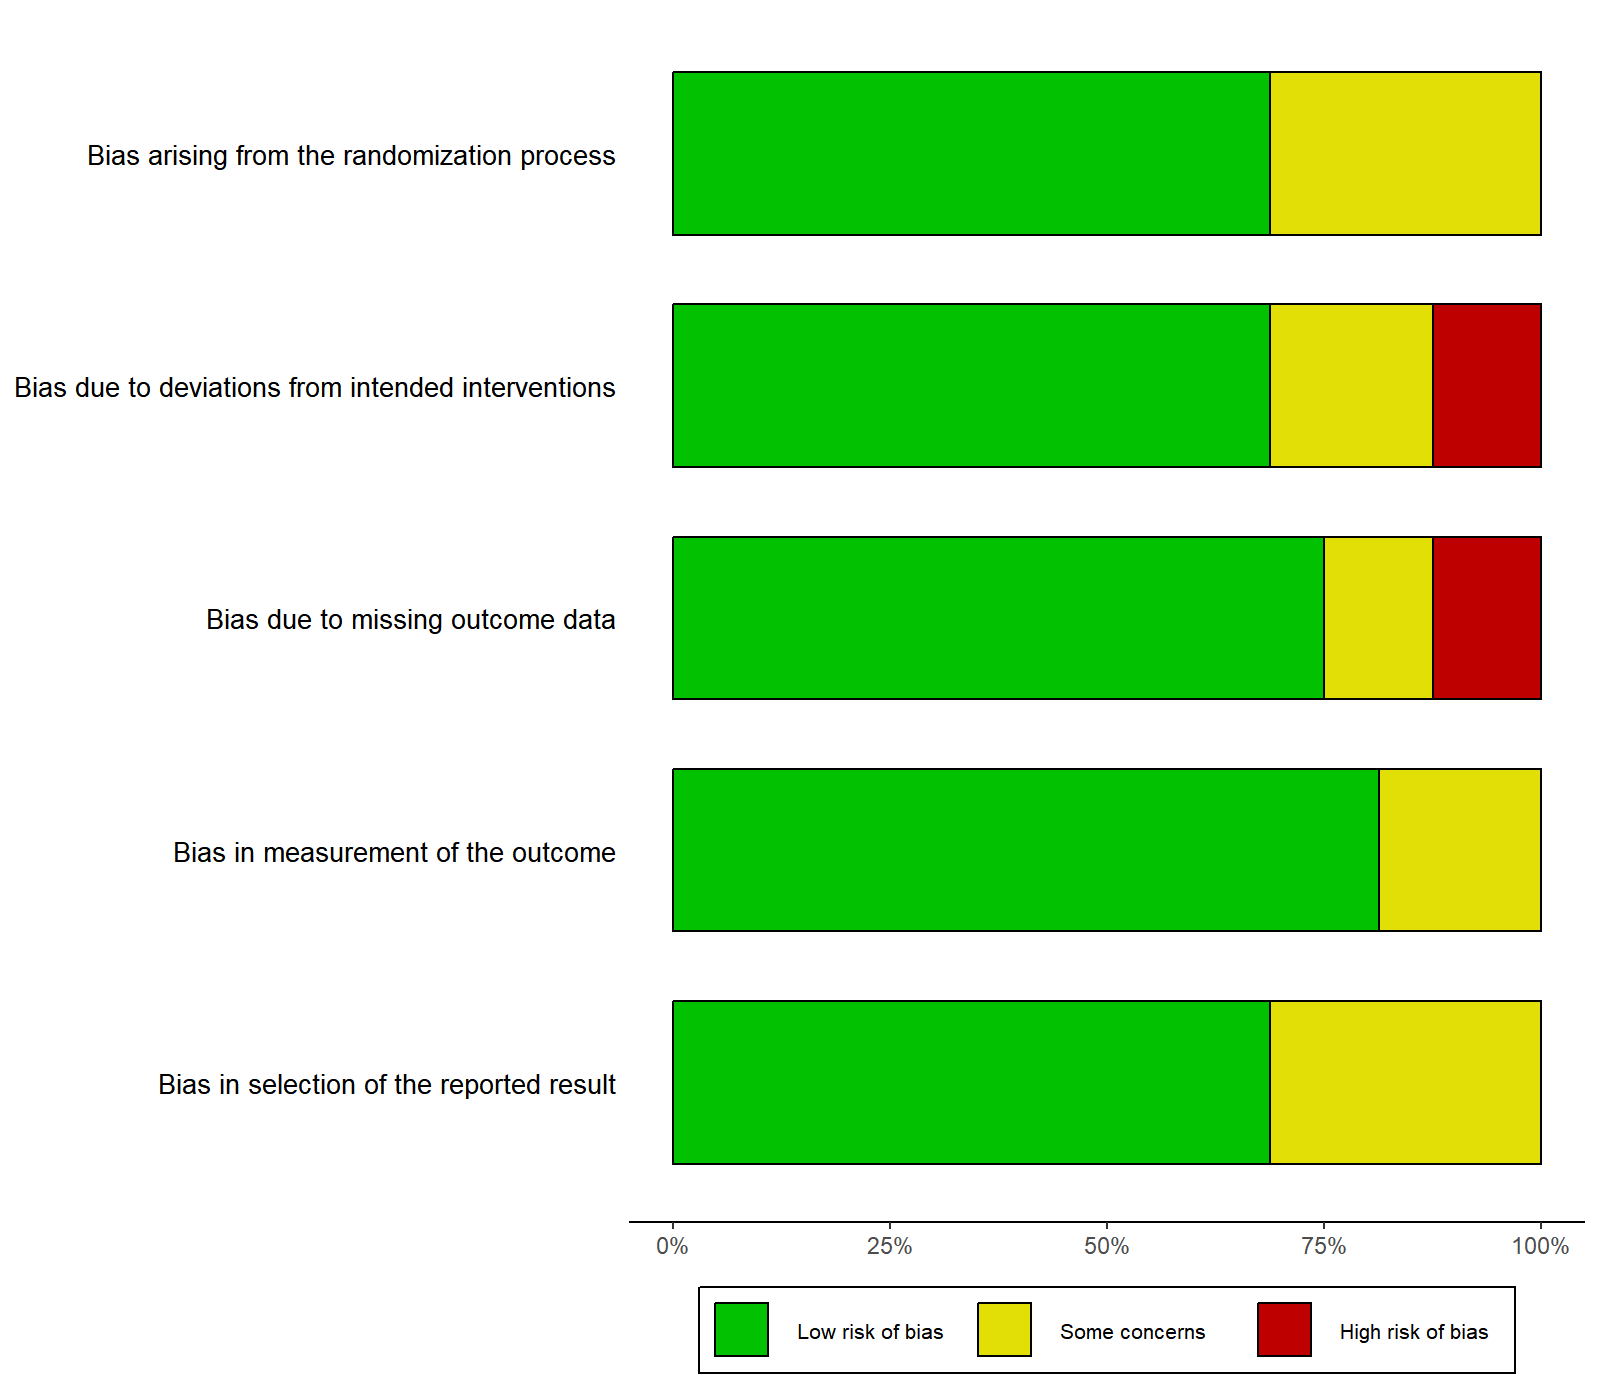


**Supplemental Figure 2. Forest plot of the effect of perioperative intravenous lidocaine on quality of recovery after video-assisted thoracic surgery.**

**
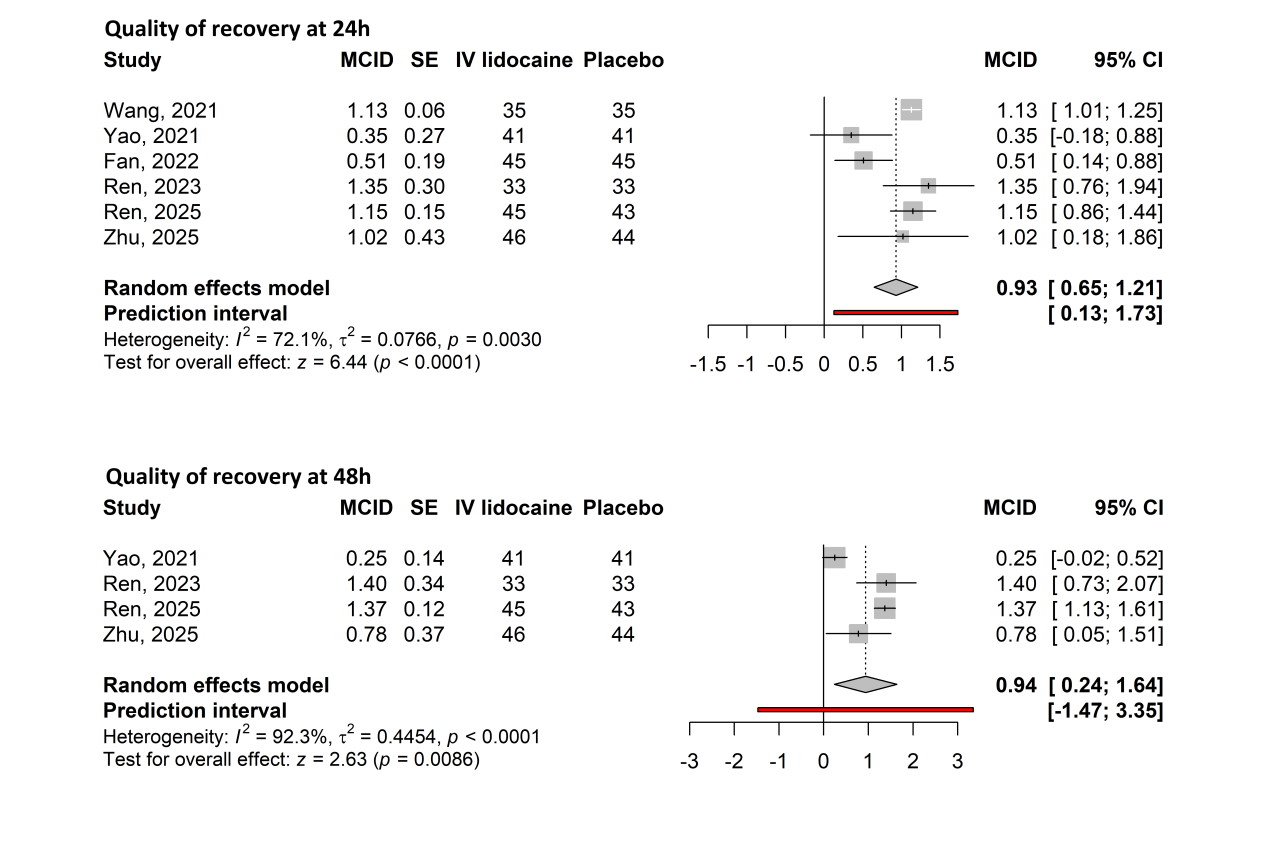
**

**Supplemental Figure 3. Forest plot of the effect of perioperative intravenous lidocaine on postoperative nausea and vomiting (PONV) after video-assisted thoracic surgery.**

**
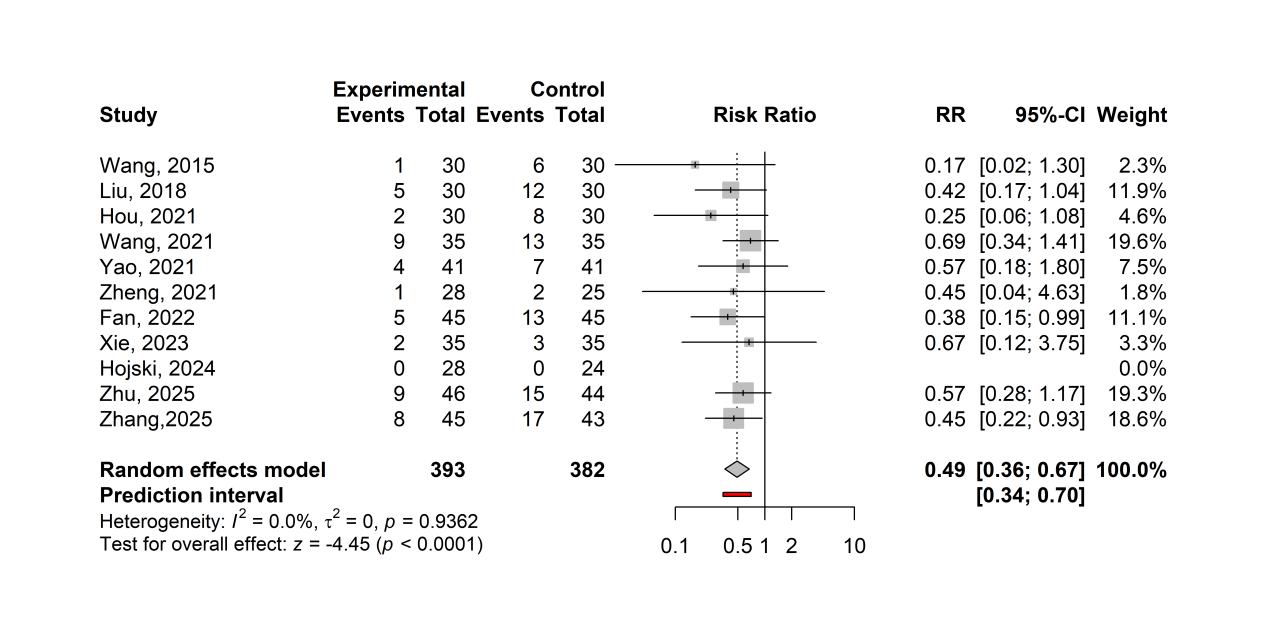
**

**Supplemental Figure 4. Forest plot of the effect of perioperative intravenous lidocaine on gastrointestinal function recovery after video-assisted thoracic surgery.**

**
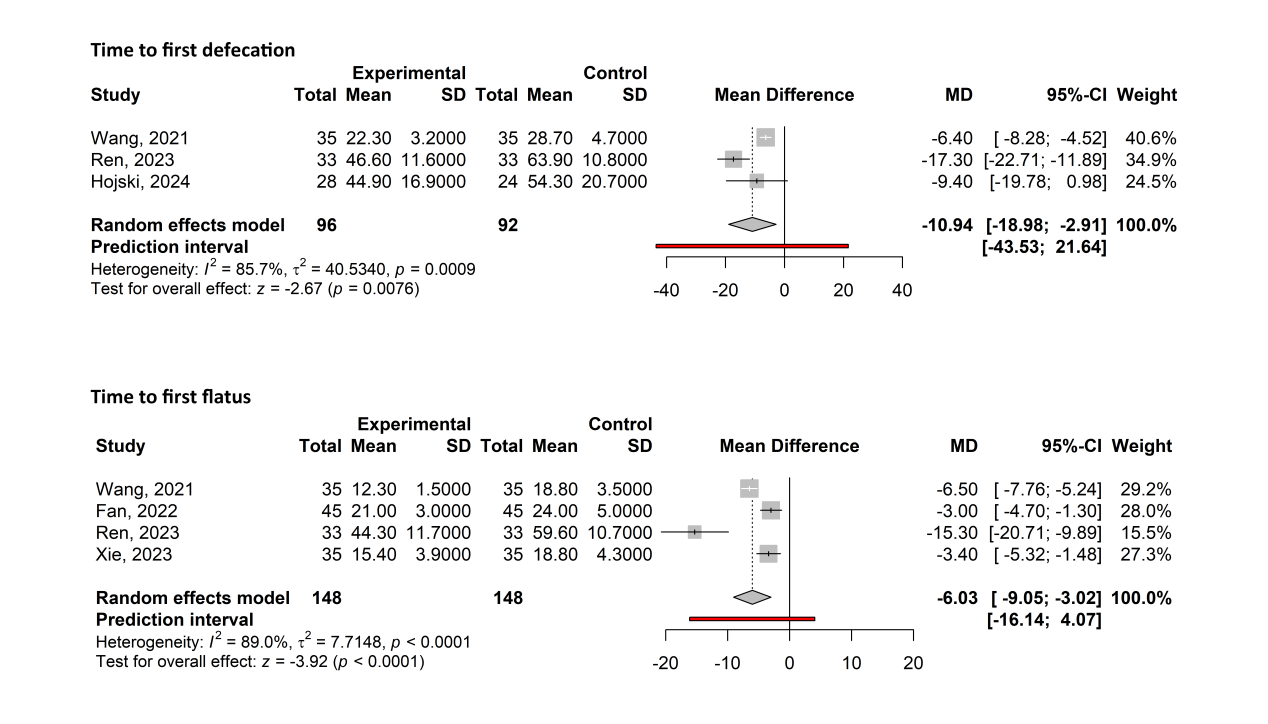
**

**Supplemental Figure 5. Forest plot of the effect of perioperative intravenous lidocaine on postoperative pulmonary complications after video-assisted thoracic surgery.**

**
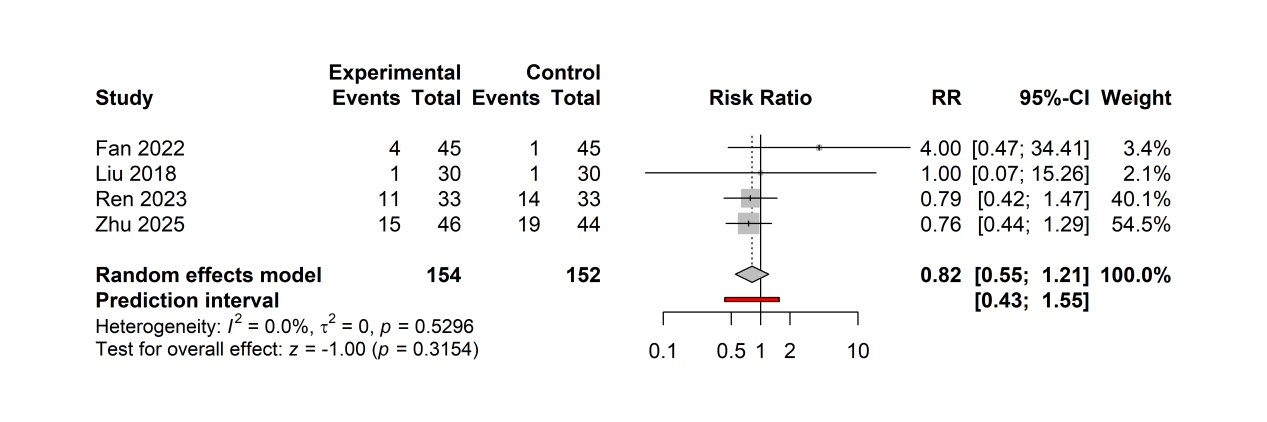
**

**Supplemental Figure 6. Forest plot of the effect of perioperative intravenous lidocaine on postoperative arrhythmias after video-assisted thoracic surgery.**

**
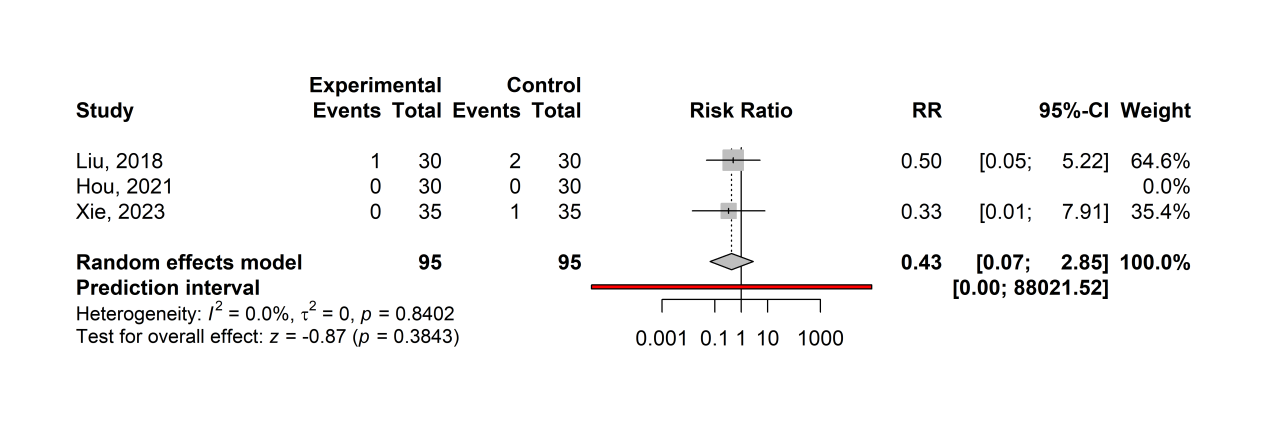
**

**Supplemental Figure 7. Forest plot of the effect of perioperative intravenous lidocaine on postoperative dizziness after video-assisted thoracic surgery.**

**
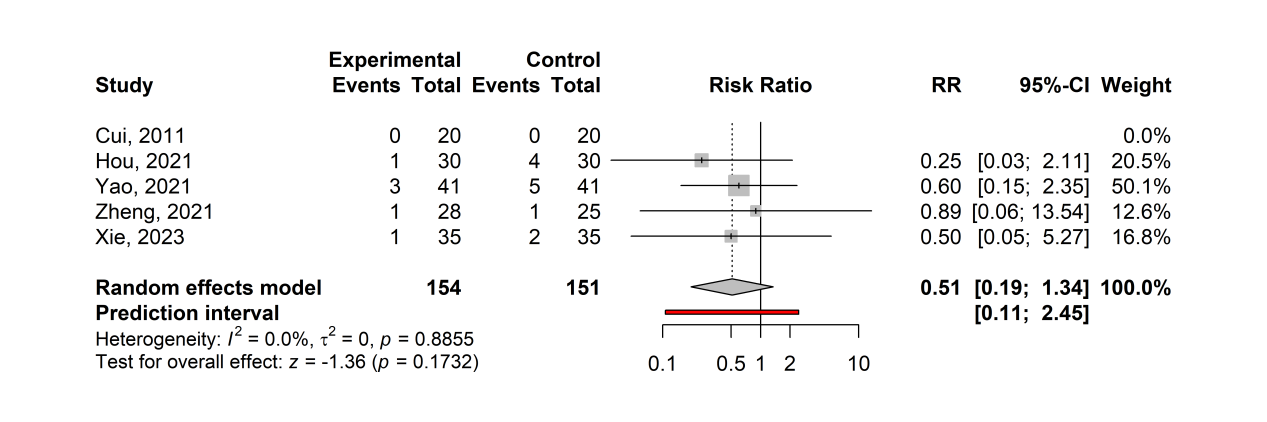
**

**Supplemental Figure 8. Forest plot of the effect of perioperative intravenous lidocaine on length of hospitalization after video-assisted thoracic surgery.**

**
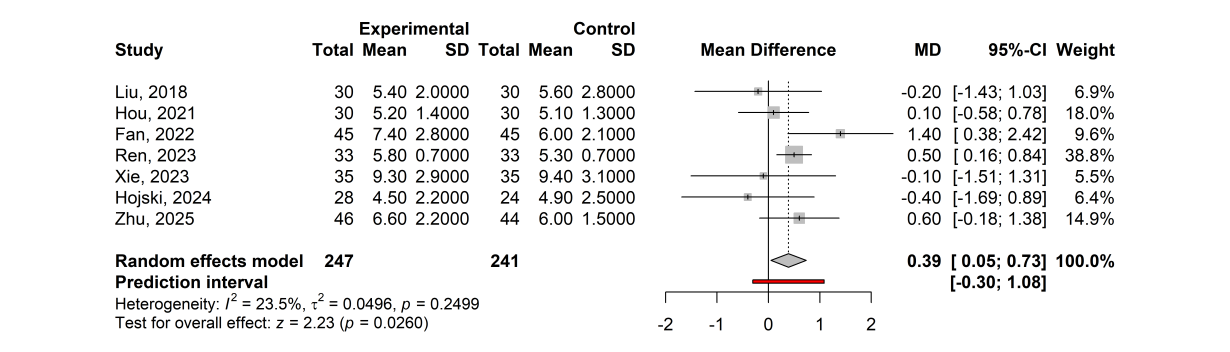
**

**Supplemental Figure 9. Forest plot for the subgroup analysis of pain scores (at rest) at 24 h by anesthesia methods.**

**
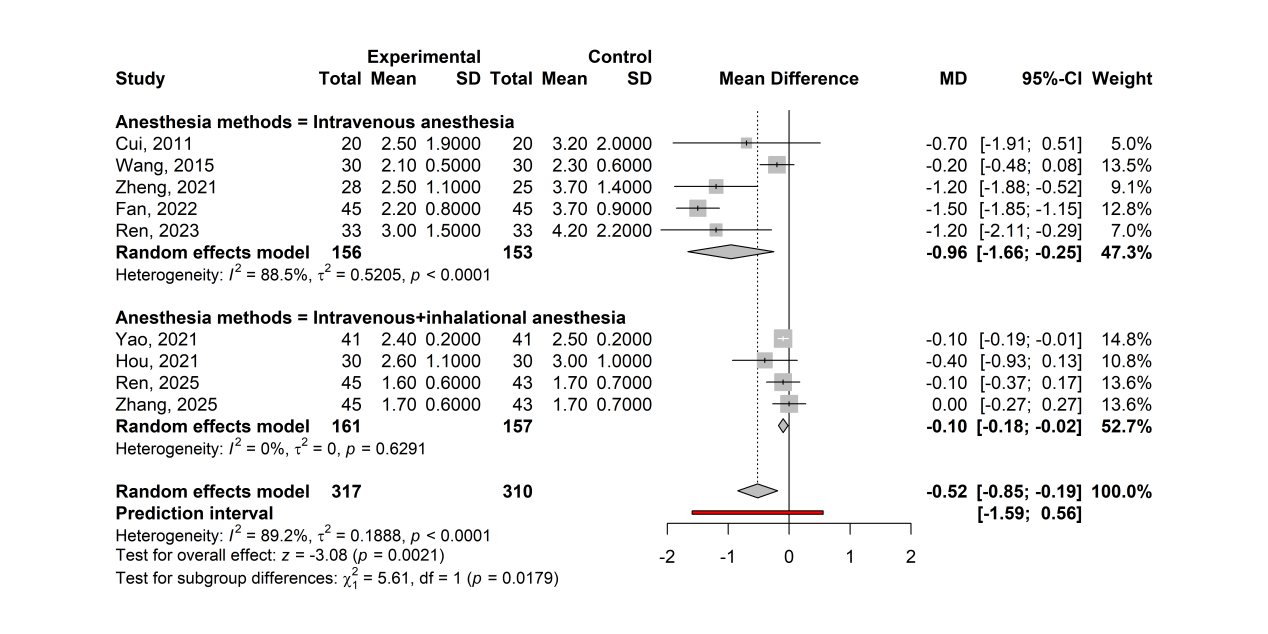
**

**Supplemental Figure 10. Forest plot for the subgroup analysis of pain scores (during activity) at 24 h by anesthesia methods.**

**
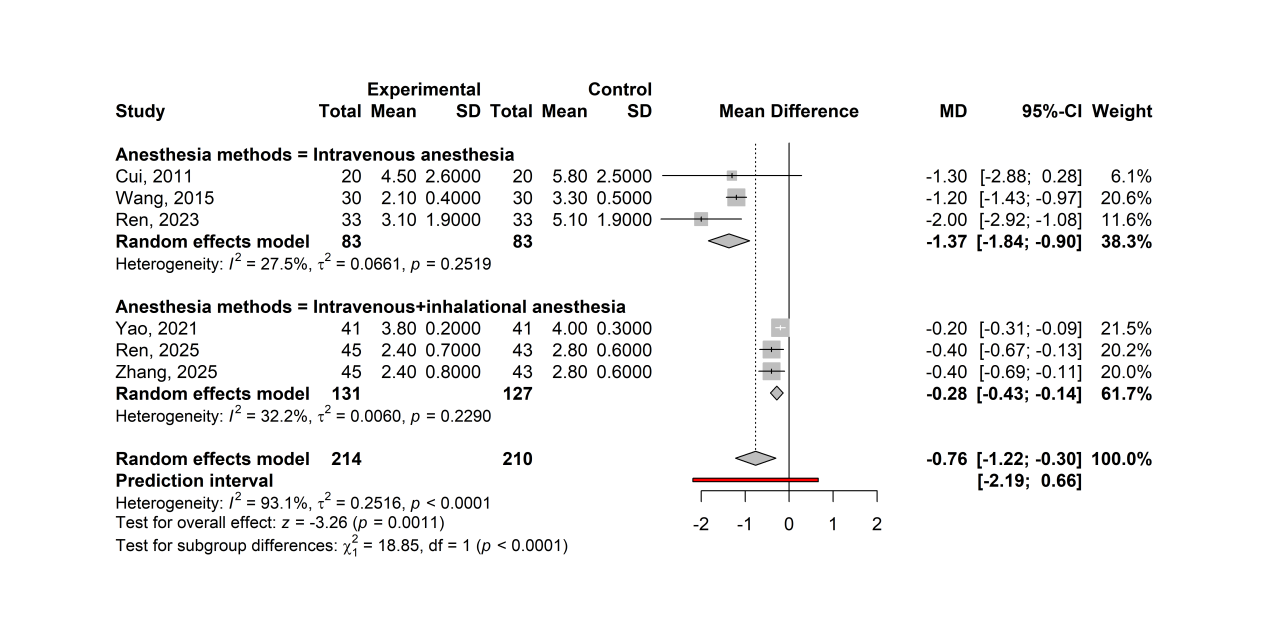
**

**Supplemental Figure 11. Forest plot for the subgroup analysis of pain scores (at rest) at 24 h by lidocaine infusion duration.**

**
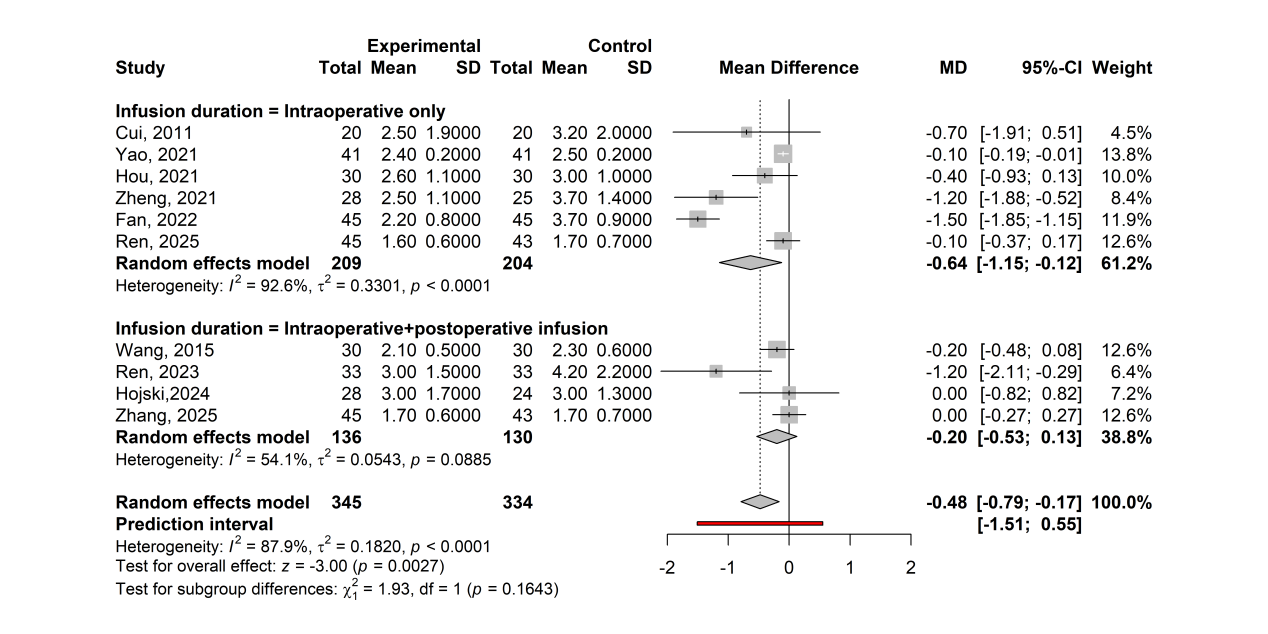
**

**Supplemental Figure 12. Forest plot for the subgroup analysis of pain scores (during activity) at 24 h by lidocaine infusion duration.**

**
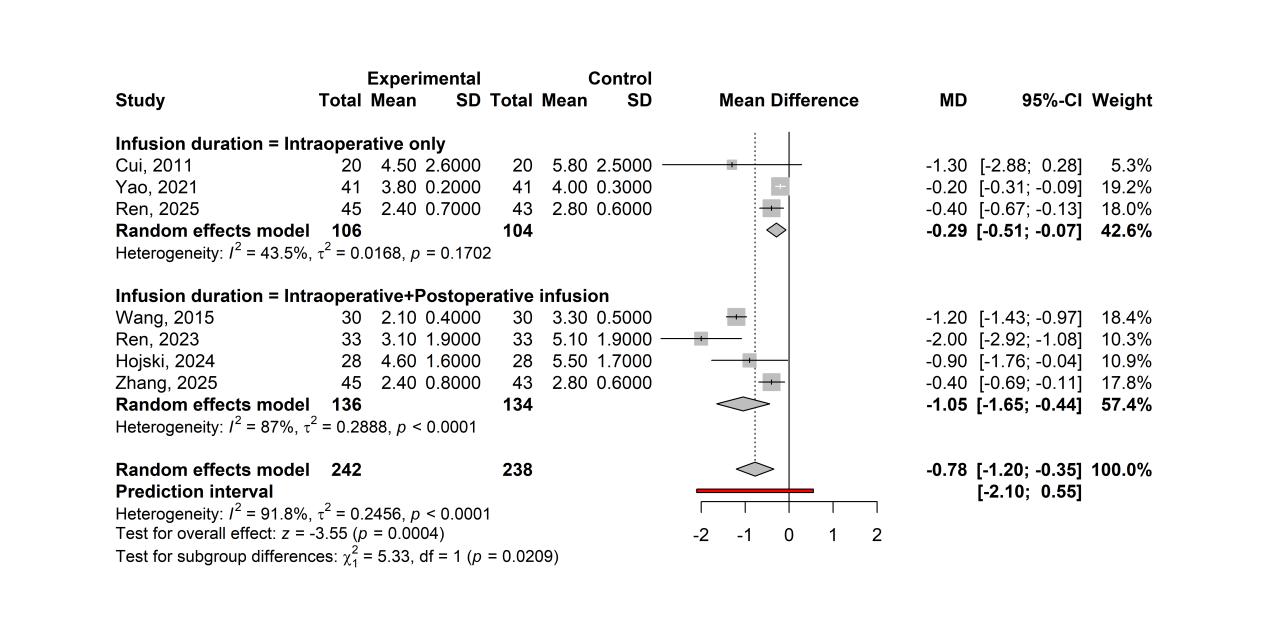
**

**Supplemental Figure 13. Funnel plot for the primary outcomes in included studies.**

(A) Pain score (at rest) at 6-8 h; (B) Pain score (at rest) at 24 h; (C) Pain score (at rest) at 48 h; (D) Pain score (during activity) at 6-8 h; (E) Pain score (during activity) at 24 h; (F) Pain score (during activity) at 48 h.


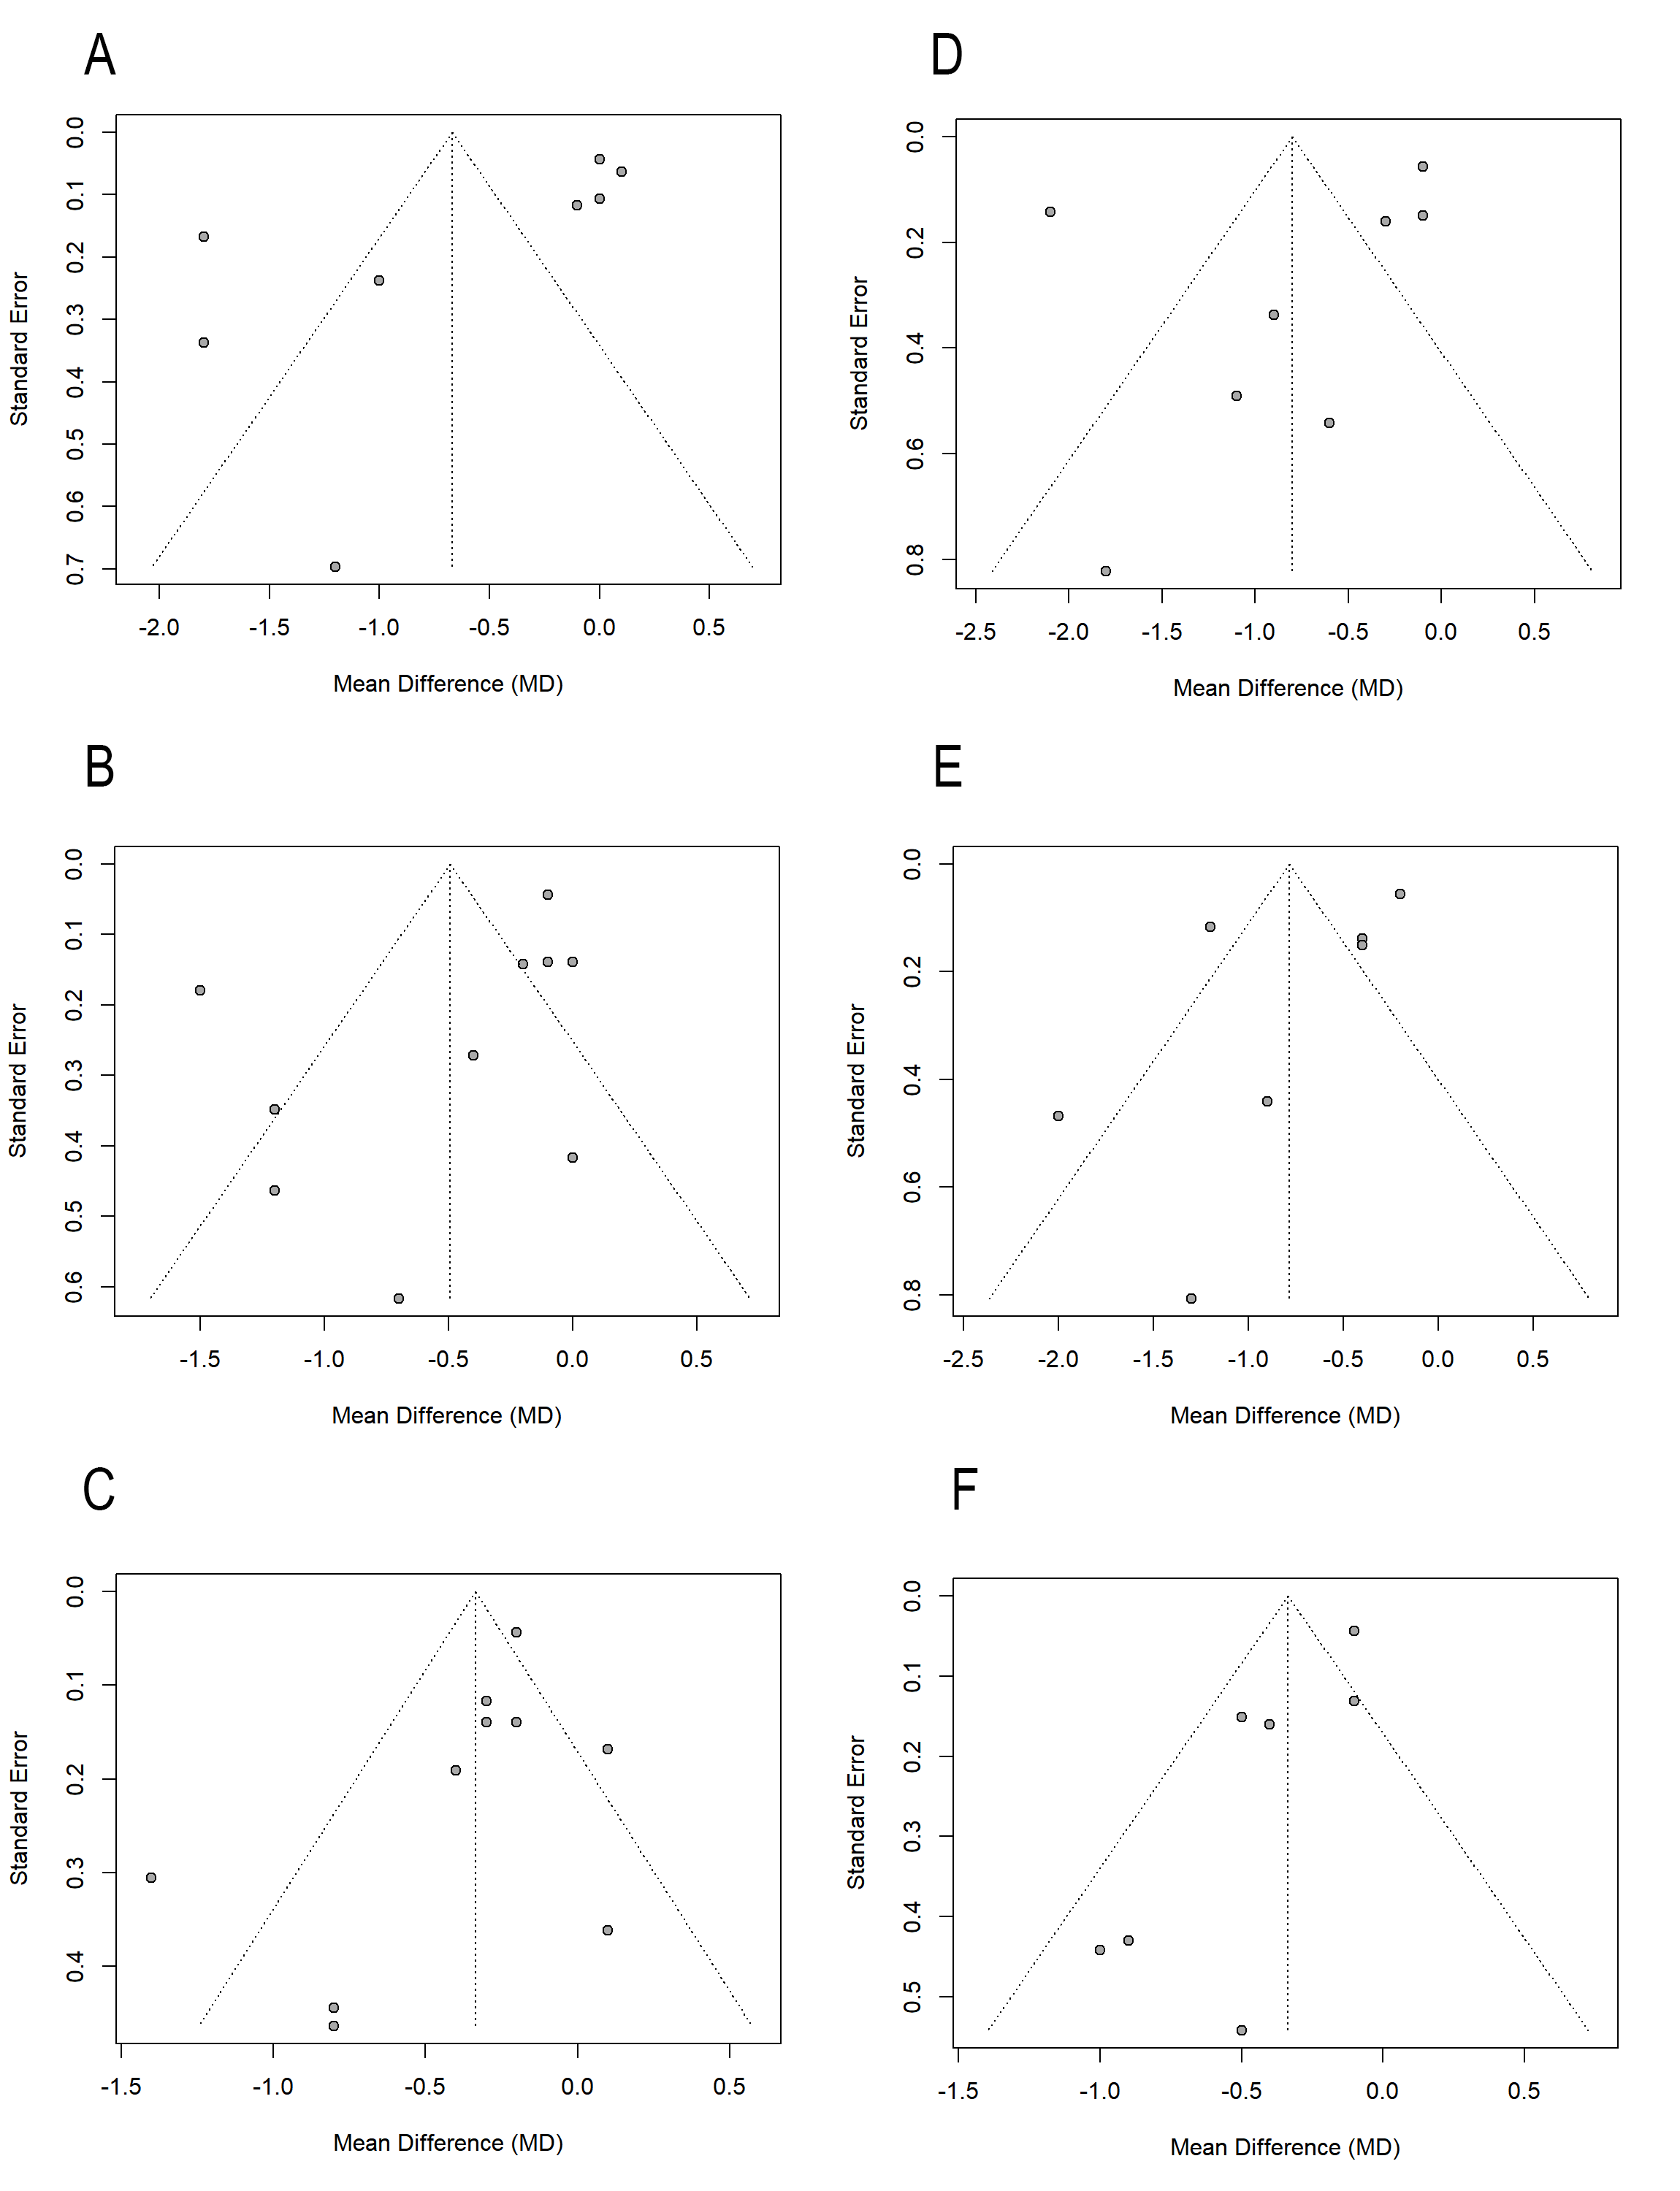

Supplement: Supplementary file 1 [file 616585%20Supplemental.docx]
